# Supplementary material for: Systematic Review of the Effectiveness of Community Intervention and Health Promotion Programs for the Prevention of Non-Communicable Diseases in Japan and Other East and Southeast Asian Countries
Source: PubMed Central journal article supplement — Circ Rep. 2022 Mar 29;4(4):149–57. doi: 10.1253/circrep.CR-21-0165 (PMC8977194; doi:10.1253/circrep.cr-21-0165), 2022-03-29
Supplement: circrep-4-149-s001.pdf [file circrep-4-149-s001.pdf]

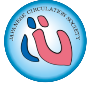

---

## **Systematic Review of the Effectiveness of Community Intervention and Health Promotion Programs for the Prevention of Non-Communicable Diseases in Japan and Other East and Southeast Asian Countries**

---

Akihiro Hirashiki, MD, PhD; Atsuya Shimizu, MD, PhD; Kenichiro Nomoto, MD;  
Manabu Kokubo, MD, PhD; Noriyuki Suzuki, MD; Hidenori Arai, MD, PhD

**Supplementary Table 1**Search strategy and history: **MEDLINE** (searched via OvidSP, 2019/03/06)

| No. | Search                                                                                                                     | Result    | Comments |
|-----|----------------------------------------------------------------------------------------------------------------------------|-----------|----------|
| 1   | *Noncommunicable Diseases/                                                                                                 | 446       |          |
| 2   | exp *Cardiovascular Diseases/                                                                                              | 1,912,108 |          |
| 3   | exp *Diabetes Mellitus/                                                                                                    | 318,619   |          |
| 4   | or/1-3                                                                                                                     | 2,164,944 |          |
| 5   | exp Preventive Health Services/                                                                                            | 559,101   |          |
| 6   | exp Attitude to Health/                                                                                                    | 385,556   |          |
| 7   | (randomized controlled trial or controlled clinical trial or clinical trial or meta analysis or practice guideline).pt.    | 920,589   |          |
| 8   | or/5-7                                                                                                                     | 1,723,606 |          |
| 9   | 8 not (ep or th or dt or tu or rh).fs.                                                                                     | 911,005   |          |
| 10  | (pc or ed).fs.                                                                                                             | 1,460,040 |          |
| 11  | (prevent* or control).ti,kw.                                                                                               | 570,974   |          |
| 12  | or/9-11                                                                                                                    | 2,521,954 |          |
| 13  | 4 and 12                                                                                                                   | 274,045   |          |
| 14  | exp *Hypertension/                                                                                                         | 177,644   |          |
| 15  | *Blood Pressure/                                                                                                           | 78,881    |          |
| 16  | exp *Body Weight/                                                                                                          | 196,854   |          |
| 17  | exp *Dyslipidemia/                                                                                                         | 51,355    |          |
| 18  | or/14-17                                                                                                                   | 471,271   |          |
| 19  | 18 not (ep.fs. not (or/10-11))                                                                                             | 413,551   |          |
| 20  | or/13,19                                                                                                                   | 654,576   |          |
| 21  | Community-Based Participatory Research/                                                                                    | 3,741     |          |
| 22  | Healthy People Programs/                                                                                                   | 1,105     |          |
| 23  | exp Health Education/                                                                                                      | 230,630   |          |
| 24  | Health Promotion/                                                                                                          | 68,686    |          |
| 25  | Health Fairs/                                                                                                              | 465       |          |
| 26  | Program Evaluation/                                                                                                        | 58,693    |          |
| 27  | ((social or society or communit* or population or prefecture* or pref or county or counties or city or town or local) adj3 | 87,503    |          |

|    |                                                                                                  |           |     |
|----|--------------------------------------------------------------------------------------------------|-----------|-----|
|    | (based or intervention* or program* or study or studies)).ti,kw.                                 |           |     |
| 28 | or/21-27                                                                                         | 358,659   |     |
| 29 | 28 not ((exp Infant/ or exp Child/ or Adolescent/) not exp Adult/)                               | 319,898   |     |
| 30 | 20 and 29                                                                                        | 23,135    |     |
| 31 | ("noncommunicable disease*" or "non-communicable disease").ti,kw.                                | 1,294     |     |
| 32 | (ncd or ncds).ti,kw.                                                                             | 470       |     |
| 33 | (cardiac or cardio* or heart or myocard* or vascular or stroke or infarction or thrombo*).ti,kw. | 1,263,066 |     |
| 34 | ((diabet* or dm) not (complicat* or foot or feet or renal or kidney or nephrol*)).ti,kw.         | 305,220   |     |
| 35 | (hypertensi* or "blood pressure").ti,kw.                                                         | 249,408   |     |
| 36 | (obesity or overweight or weight or bmi).ti,kw.                                                  | 197,421   |     |
| 37 | (dyslipidem* or hyperlipidem* or "blood lipid").ti,kw.                                           | 14,526    |     |
| 38 | or/31-37                                                                                         | 1,928,114 |     |
| 39 | (prevent* or control).ti,kw.                                                                     | 570,974   |     |
| 40 | or/27,39                                                                                         | 652,503   |     |
| 41 | (school* or student* or teacher* or workplace* or industrial* or employee* or worker*).ti,kw.    | 302,944   |     |
| 42 | 40 not 41                                                                                        | 639,221   |     |
| 43 | 38 and 42                                                                                        | 84,520    |     |
| 44 | 43 not medline.st.                                                                               | 10,138    |     |
| 45 | or/30,44                                                                                         | 33,273    |     |
| 46 | exp Japan/                                                                                       | 125,768   |     |
| 47 | japan.ti,ab,kw.                                                                                  | 108,214   |     |
| 48 | or/46-47                                                                                         | 180,544   |     |
| 49 | 45 and 48                                                                                        | 310       |     |
| 50 | remove duplicates from 49                                                                        | 310       | CQ1 |
| 51 | exp Asia, Southeastern/ or exp Far East/                                                         | 443,392   |     |

|    |                                                                                                                                                                                                   |         |     |
|----|---------------------------------------------------------------------------------------------------------------------------------------------------------------------------------------------------|---------|-----|
| 52 | (china or japan or korea or mongolia or taiwan or borneo or brunei or cambodia or indonesia or laos or malaysia or myanmar or philippines or singapore or thailand or timor or vietnam).ti,ab,kw. | 388,357 |     |
| 53 | or/51-52                                                                                                                                                                                          | 599,582 |     |
| 54 | 53 not 48                                                                                                                                                                                         | 419,038 |     |
| 55 | 45 and 54                                                                                                                                                                                         | 1,201   |     |
| 56 | remove duplicates from 55                                                                                                                                                                         | 1,201   | CQ2 |
| 57 | ec.fs.                                                                                                                                                                                            | 402,714 |     |
| 58 | exp Economics/                                                                                                                                                                                    | 573,517 |     |
| 59 | (cost or costs or expenditure* or budget* or econom*).ti,kw.                                                                                                                                      | 186,398 |     |
| 60 | or/57-59                                                                                                                                                                                          | 755,025 |     |
| 61 | 50 and 60                                                                                                                                                                                         | 13      | CQ3 |
| 62 | 56 and 60                                                                                                                                                                                         | 53      | CQ4 |

**Supplementary Table 2**Search strategy and history: **Cochrane Library** (searched via Wiley, 2019/03/06)

| No. | Search                                                                                                                                              | Result  | Comments |
|-----|-----------------------------------------------------------------------------------------------------------------------------------------------------|---------|----------|
| 1   | MeSH descriptor: [Noncommunicable Diseases] this term only                                                                                          | 2       |          |
| 2   | MeSH descriptor: [Cardiovascular Diseases] explode all trees and with qualifier(s): [prevention & control - PC]                                     | 15,522  |          |
| 3   | MeSH descriptor: [Diabetes Mellitus] explode all trees and with qualifier(s): [prevention & control - PC]                                           | 2,050   |          |
| 4   | MeSH descriptor: [Dyslipidemias] explode all trees                                                                                                  | 6,691   |          |
| 5   | MeSH descriptor: [Blood Pressure] this term only                                                                                                    | 25,673  |          |
| 6   | MeSH descriptor: [Overweight] explode all trees                                                                                                     | 13,841  |          |
| 7   | ("noncommunicable disease*" or "non-communicable disease"):ti,kw                                                                                    | 89      |          |
| 8   | (ncd or nclds):ti,kw                                                                                                                                | 12      |          |
| 9   | (cardiac or cardio* or heart or myocard* or vascular or stroke or infarction or thrombo*):ti,kw not (therap* or drug* or rehabil* or epidemiol*):kw | 76,672  |          |
| 10  | (hypertensi* or "blood pressure"):ti,kw                                                                                                             | 73,629  |          |
| 11  | (dyslipidem* or hyperlipidem* or "blood lipid"):ti,kw                                                                                               | 6,471   |          |
| 12  | ((diabet* or dm) not (complicat* or foot or feet or renal or kidney or nephrol*)):ti,kw not (therap* or drug* or rehabil* or epidemiol*):kw         | 20,630  |          |
| 13  | (obesity or overweight or weight or bmi):ti,kw                                                                                                      | 60,481  |          |
| 14  | #1 or #2 or #3 or #4 or #5 or #6 or #7 or #8                                                                                                        | 223,115 |          |

|    |                                                                                                                                                                                              |         |  |
|----|----------------------------------------------------------------------------------------------------------------------------------------------------------------------------------------------|---------|--|
|    | or #9 or #10 or #11 or #12 or #13                                                                                                                                                            |         |  |
| 15 | (prevent* or control):ti,kw                                                                                                                                                                  | 184,239 |  |
| 16 | MeSH descriptor: [Community-Based Participatory Research] this term only                                                                                                                     | 222     |  |
| 17 | MeSH descriptor: [Healthy People Programs] this term only                                                                                                                                    | 11      |  |
| 18 | MeSH descriptor: [Health Education] this term only                                                                                                                                           | 3,591   |  |
| 19 | MeSH descriptor: [Health Promotion] this term only                                                                                                                                           | 5,089   |  |
| 20 | MeSH descriptor: [Program Evaluation] this term only                                                                                                                                         | 5,548   |  |
| 21 | ("health education" or "health promotion"):ti,kw                                                                                                                                             | 11,995  |  |
| 22 | ((social or society or communit* or population or prefecture* or pref or county or counties or city or town or local) NEAR/2 (based or intervention* or program* or study or studies)):ti,kw | 9,085   |  |
| 23 | #15 or #16 or #17 or #18 or #19 or #20 or #21 or #22                                                                                                                                         | 198,471 |  |
| 24 | epidemiol*.ti                                                                                                                                                                                | 0       |  |
| 25 | (school* or student* or teacher* or workplace* or industrial* or employee* or worker*):ti,kw                                                                                                 | 34,752  |  |
| 26 | MeSH descriptor: [Noncommunicable Diseases] this term only and with qualifier(s): [drug therapy - DT, rehabilitation - RH, therapy - TH]                                                     | 0       |  |
| 27 | MeSH descriptor: [Cardiovascular Diseases] explode all trees and with qualifier(s): [drug therapy - DT, therapy - TH]                                                                        | 45,231  |  |
| 28 | MeSH descriptor: [Diabetes Mellitus] explode all trees and with qualifier(s): [diet                                                                                                          | 4,011   |  |

|    |                                                                                                                                                                                                                                                                                                                                                                                                                                                                                                                                                                                                                                                          |         |     |
|----|----------------------------------------------------------------------------------------------------------------------------------------------------------------------------------------------------------------------------------------------------------------------------------------------------------------------------------------------------------------------------------------------------------------------------------------------------------------------------------------------------------------------------------------------------------------------------------------------------------------------------------------------------------|---------|-----|
|    | therapy - DH, rehabilitation - RH, therapy - TH]                                                                                                                                                                                                                                                                                                                                                                                                                                                                                                                                                                                                         |         |     |
| 29 | #24 or #25 or #26 or #27 or #28                                                                                                                                                                                                                                                                                                                                                                                                                                                                                                                                                                                                                          | 83,121  |     |
| 30 | #23 not #29                                                                                                                                                                                                                                                                                                                                                                                                                                                                                                                                                                                                                                              | 178,309 |     |
| 31 | #14 and #30                                                                                                                                                                                                                                                                                                                                                                                                                                                                                                                                                                                                                                              | 40,148  |     |
| 32 | MeSH descriptor: [Japan] explode all trees                                                                                                                                                                                                                                                                                                                                                                                                                                                                                                                                                                                                               | 2,792   |     |
| 33 | (japan or okinawa or ibaraki or kanagawa or kawasaki or sagamihara or yokohama or gumma or saitama or chiba or tokyo or tochigi or oita or kagoshima or kumamoto or saga or nagasaki or fukuoka or kitakyushu or kita-kyushi or miyazaki or osaka or sakai or kyoto or shiga or nara or hyogo or kobe or mie or wakayama or ehime or kagawa or kochi or tokushima or shimane or tottori or okayama or hiroshima or yamaguchi or aichi or nagoya or shizuoka or hamamatsu or gifu or nagano or yamanashi or ishikawa or toyama or niigata or fukui or aomori or akita or iwate or fukushima or niyagi or sendai or yamagata or hokkaido or sapporo):ti,kw | 6,442   |     |
| 34 | #32 or #33                                                                                                                                                                                                                                                                                                                                                                                                                                                                                                                                                                                                                                               | 6,442   |     |
| 35 | #31 and #34                                                                                                                                                                                                                                                                                                                                                                                                                                                                                                                                                                                                                                              | 339     | CQ1 |
| 36 | MeSH descriptor: [Asia, Southeastern] explode all trees                                                                                                                                                                                                                                                                                                                                                                                                                                                                                                                                                                                                  | 2,370   |     |
| 37 | MeSH descriptor: [Far East] explode all trees                                                                                                                                                                                                                                                                                                                                                                                                                                                                                                                                                                                                            | 8,899   |     |
| 38 | (china or japan or korea or mongolia or taiwan or borneo or brunei or cambodia or indonesia or laos or malaysia or myanmar or philippines or singapore or thailand or timor or vietnam):ti,kw                                                                                                                                                                                                                                                                                                                                                                                                                                                            | 20,766  |     |
| 39 | #36 or #37 or #38                                                                                                                                                                                                                                                                                                                                                                                                                                                                                                                                                                                                                                        | 21,562  |     |
| 40 | #39 not #34                                                                                                                                                                                                                                                                                                                                                                                                                                                                                                                                                                                                                                              | 15,571  |     |

|    |                                                             |        |     |
|----|-------------------------------------------------------------|--------|-----|
| 41 | #31 and #40                                                 | 875    | CQ2 |
| 42 | (cost or costs or expenditure* or budget* or econom*):ti,kw | 28,746 |     |
| 43 | MeSH descriptor: [Economics] explode all trees              | 11,539 |     |
| 44 | #42 or #43                                                  | 29,993 |     |
| 45 | #35 and #44                                                 | 9      | CQ3 |
| 46 | #41 and #44                                                 | 38     | CQ4 |

|                         |                                                |     |                                                                                |
|-------------------------|------------------------------------------------|-----|--------------------------------------------------------------------------------|
| Clinical Question (CQ)1 | Clinical Trials                                | 339 |                                                                                |
| CQ2                     | Cochrane database of Systematic Reviews (CDSR) | 1   | Excluded from the results: Mefloquine for preventing malaria in pregnant women |
|                         | Trials                                         | 874 |                                                                                |
| CQ3                     | Trials                                         | 9   |                                                                                |
| CQ4                     | Trials                                         | 38  |                                                                                |



**Supplementary Table 3**

Search strategy and history: Ichushi (Japanese) (searched via Ichushi-Web, 2019/03/06)

| No. | Search                                                                                                       | Result    | Comments |
|-----|--------------------------------------------------------------------------------------------------------------|-----------|----------|
| 1   | 非感染性疾患/TH not (SH=治療,薬物療法,外科的療法,リハビリテーション,合併症,疫学)                                                            | 18,694    |          |
| 2   | NCDs/TA or "non-communicable diseases"/TA or "noncommunicable diseases"/TA                                   | 188       |          |
| 3   | 心臓血管疾患/TH not (SH=治療,薬物療法,外科的療法,リハビリテーション,合併症,疫学)                                                            | 550,013   |          |
| 4   | 高血圧/TH                                                                                                       | 100,244   |          |
| 5   | 糖尿病/TH not (SH=治療,薬物療法,外科的療法,リハビリテーション,合併症,疫学)                                                               | 124,621   |          |
| 6   | 脂質異常症/TH                                                                                                     | 36,474    |          |
| 7   | 血圧/TH                                                                                                        | 40,101    |          |
| 8   | 体重/TH                                                                                                        | 89,450    |          |
| 9   | 心臓/TI or 心疾患/TI or 心筋/TI or 血管/TI or 卒中/TI or 梗塞/TI or 血栓/TI                                                 | 659,721   |          |
| 10  | 血圧/TI                                                                                                        | 129,252   |          |
| 11  | 脂質/TI or 脂血/TI                                                                                               | 79,536    |          |
| 12  | 糖尿病/TI not (合併症/TI or 腎症/TI)                                                                                 | 199,970   |          |
| 13  | 肥満/TI or 体重/TI or 減量/TI                                                                                      | 81,646    |          |
| 14  | cardiac/TI or cardio/TI or heart/TI or myocard/TI or vascular/TI or stroke/TI or infarction/TI or thrombo/TI | 88,758    |          |
| 15  | hypertensi/TI or "blood pressure"/TI                                                                         | 10,743    |          |
| 16  | dyslipidem/TI or hyperlipidem/TI or "blood lipid"/TI                                                         | 829       |          |
| 17  | (diabet/TI or dm/TI) not (complicat/TI or renal/TI or kidney/TI or nephro/TI)                                | 42,828    |          |
| 18  | obesity/TI or overweight/TI or weight/TI or bmi/TI                                                           | 11,335    |          |
| 19  | #9 or #10 or #11 or #12 or #13 or #14 or #15 or #16 or #17 or #18                                            | 1,156,983 |          |
| 20  | #19 and (DATA=pre)                                                                                           | 10,863    |          |
| 21  | #1 or #2 or #3 or #4 or #5 or #6 or #7 or #8 or #20                                                          | 848,718   |          |
| 22  | SH=予防                                                                                                        | 303,231   |          |

|    |                                                                                                                                                                                                                                                                                                                                                                                                                                                                                                                                                                                                                                                                         |         |  |
|----|-------------------------------------------------------------------------------------------------------------------------------------------------------------------------------------------------------------------------------------------------------------------------------------------------------------------------------------------------------------------------------------------------------------------------------------------------------------------------------------------------------------------------------------------------------------------------------------------------------------------------------------------------------------------------|---------|--|
| 23 | 予防/TI or prevent/TI or コントロ/TI or control/TI                                                                                                                                                                                                                                                                                                                                                                                                                                                                                                                                                                                                                            | 187,537 |  |
| 24 | 予防的保健医療サービス/TH                                                                                                                                                                                                                                                                                                                                                                                                                                                                                                                                                                                                                                                          | 325,703 |  |
| 25 | @健康教育/TH                                                                                                                                                                                                                                                                                                                                                                                                                                                                                                                                                                                                                                                                | 23,804  |  |
| 26 | 健康増進/TH                                                                                                                                                                                                                                                                                                                                                                                                                                                                                                                                                                                                                                                                 | 14,354  |  |
| 27 | "計画評価(保健医療)"/TH                                                                                                                                                                                                                                                                                                                                                                                                                                                                                                                                                                                                                                                         | 896     |  |
| 28 | "health education"/TI or "health promotion"/TI                                                                                                                                                                                                                                                                                                                                                                                                                                                                                                                                                                                                                          | 428     |  |
| 29 | (教育/TI or 教室/TI or 指導/TI) and (DATA=pre)                                                                                                                                                                                                                                                                                                                                                                                                                                                                                                                                                                                                                                | 2,269   |  |
| 30 | #22 or #23 or #24 or #25 or #26 or #27 or #28 or #29                                                                                                                                                                                                                                                                                                                                                                                                                                                                                                                                                                                                                    | 670,602 |  |
| 31 | 日本/TH                                                                                                                                                                                                                                                                                                                                                                                                                                                                                                                                                                                                                                                                   | 127,598 |  |
| 32 | 府/TI or 県/TI and or 沖縄/TI or 茨城/TI or 神奈川/TI or 川崎/TI or 相模原/TI or 横浜/TI or 群馬/TI or 埼玉/TI or さいたま/TI or 千葉/TI or 東京/TI or 栃木/TI or 大分/TI or 鹿児島/TI or 熊本/TI or 佐賀/TI or 長崎/TI or 福岡/TI or 北九州/TI or 宮崎/TI or 大阪/TI or 堺/TI or 京都/TI or 滋賀/TI or 奈良/TI or 兵庫/TI or 神戸/TI or 三重/TI or 和歌山/TI or 愛媛/TI or 香川/TI or 高知/TI or 徳島/TI or 島根/TI or 鳥取/TI or 岡山/TI or 広島/TI or 山口/TI or 愛知/TI or 名古屋/TI or 静岡/TI or 浜松/TI or 岐阜/TI or 長野/TI or 山梨/TI or 石川/TI or 富山/TI or 新潟/TI or 福井/TI or 青森/TI or 秋田/TI or 岩手/TI or 福島/TI or 宮城/TI or 仙台/TI or 山形/TI or 北海道/TI or 札幌/TI                                                                                                      | 197,015 |  |
| 33 | prefecture/TI or okinawa/TI or ibaraki/TI or kanagawa/TI or kawasaki/TI or sagamihara/TI or yokohama/TI or gumma/TI or saitama/TI or chiba/TI or tokyo/TI or tochigi/TI or oita/TI or kagoshima/TI or kumamoto/TI or saga/TI or nagasaki/TI or fukuoka/TI or kitakyushu/TI or kita-kyushi/TI or miyazaki/TI or osaka/TI or sakai/TI or kyoto/TI or shiga/TI or nara/TI or hyogo/TI or kobe/TI or mie/TI or wakayama/TI or ehime/TI or kagawa/TI or Kochi/TI or tokushima/TI or shimane/TI or tottori/TI or okayama/TI or hiroshima/TI or yamaguchi/TI or aichi/TI or nagoya/TI or shizuoka/TI or hamamatsu/TI or gifu/TI or nagano/TI or yamanashi/TI or ishikawa/TI or | 10,332  |  |

|    |                                                                                                                                                                                                                              |         |  |
|----|------------------------------------------------------------------------------------------------------------------------------------------------------------------------------------------------------------------------------|---------|--|
|    | toyama/TI or niigata/TI or fukui/TI or aomori/TI or akita/TI or iwate/TI or fukushima/TI or niyagi/TI or sendai/TI or yamagata/TI or hokkaido/TI or sapporo/TI                                                               |         |  |
| 34 | 東南アジア/TH or 東アジア/TH                                                                                                                                                                                                          | 162,791 |  |
| 35 | 中国/TI or 韓国/TI or 朝鮮/TI or モンゴル/TI or 台湾/TI or ボルネオ/TI or ブルネイ/TI or カンボジア/TI or インドネシア/TI or ラオス/TI or マレーシア/TI or ミャンマ/TI or ビルマ/TI or フィリピン/TI or シンガポ/TI or タイ/TI or チモール/TI or ティモール/TI or ベトナム/TI or ヴェトナム/TI          | 87,239  |  |
| 36 | china/TI or korea/TI or mongolia/TI or taiwan/TI or borneo/TI or brunei/TI or cambodia/TI or indonesia/TI or laos/TI or malaysia/TI or myanmar/TI or philippines/TI or singapore/TI or thailand/TI or timor/TI or vietnam/TI | 11,010  |  |
| 37 | 市/TA or 町/TA or 村/TA or 郡/TA                                                                                                                                                                                                 | 134,915 |  |
| 38 | city/TI or town/TI or county/TI or "-shi"/TI or "-cho"/TI or "-machi"/TI or "-mura"/TI                                                                                                                                       | 15,583  |  |
| 39 | 農村部/TI or 山間部/TI or 島嶼/TI or 島しょ/TI or 離島/TI                                                                                                                                                                                 | 4,397   |  |
| 40 | 地域/TI or 住民/TI or 在住/TI                                                                                                                                                                                                      | 121,133 |  |
| 41 | "population-based"/TI or community/TI or social/TI                                                                                                                                                                           | 5,712   |  |
| 42 | #31 or #32 or #33 or #34 or #35 or #36 or #37 or #38 or #39 or #40 or #41                                                                                                                                                    | 554,865 |  |
| 43 | #30 and #42                                                                                                                                                                                                                  | 70,769  |  |
| 44 | 地域社会参加型研究/TH                                                                                                                                                                                                                 | 100     |  |
| 45 | 地域社会健康教育イベント/TH                                                                                                                                                                                                              | 1,500   |  |
| 46 | 地域保健/TI or 地域介入/TI or 社会的介入/TI                                                                                                                                                                                               | 3,754   |  |
| 47 | #43 or #44 or #45 or #46                                                                                                                                                                                                     | 74,152  |  |
| 48 | #21 and #47                                                                                                                                                                                                                  | 8,688   |  |
| 49 | 学校保健/TH or @学校/TH or 学生/TH                                                                                                                                                                                                   | 103,420 |  |
| 50 | (CK=新生児,乳児(1~23 ヶ月),幼児(2~5),小児(6~12),青年期(13~18)) not (CK=成人(19~44),中年(45~64),高齢者(65~),高齢者(80~))                                                                                                                              | 646,612 |  |

|    |                                                                                                                                         |         |     |
|----|-----------------------------------------------------------------------------------------------------------------------------------------|---------|-----|
| 51 | 学校/ТИ or 高校/ТИ or 学年/ТИ or 学生/ТИ or 生徒/ТИ<br>or 児童/ТИ or 園/ТИ                                                                           | 128,267 |     |
| 52 | school/ТИ or student/ТИ or teacher/ТИ                                                                                                   | 3,944   |     |
| 53 | 職場/ТН or 労働衛生/ТН or 労働衛生サービス/ТН<br>or 産業医学/ТН                                                                                           | 69,526  |     |
| 54 | workplace/ТИ or industrial/ТИ or compan/ТИ or<br>worker/ТИ                                                                              | 2,995   |     |
| 55 | #49 or #50 or #51 or #52 or #53 or #54                                                                                                  | 838,426 |     |
| 56 | #48 not #55                                                                                                                             | 6,979   |     |
| 57 | 介入研究/ТН or 縦断研究/ТН                                                                                                                      | 248,496 |     |
| 58 | RD=メタアナリシス,ランダム化比較試験,準ランダ<br>ム化比較試験                                                                                                     | 26,819  |     |
| 59 | プログラム/ТИ or 計画/ТИ or 事業/ТИ or 追跡/ТИ or<br>コホート/ТИ or 縦断/ТИ or 前向き/ТИ or 介入/ТИ or<br>試行/ТИ                                               | 145,589 |     |
| 60 | program/ТИ or plan/ТИ or cohort/ТИ or longitudinal/ТИ<br>or prospective/ТИ or followup/ТИ or intervention/ТИ or<br>trial/ТИ or study/ТИ | 97,253  |     |
| 61 | @"アウトカム評価(保健医療)"/ТН                                                                                                                     | 10,957  |     |
| 62 | #57 or #58 or #59 or #60 or #61                                                                                                         | 453,163 |     |
| 63 | #56 and #62                                                                                                                             | 1,408   |     |
| 64 | #34 or #35 or #36                                                                                                                       | 228,667 |     |
| 65 | #31 or #32 or #33                                                                                                                       | 273,409 |     |
| 66 | #64 not #65                                                                                                                             | 100,304 |     |
| 67 | 中国地方/ТИ or 四国/ТИ                                                                                                                        | 1,192   |     |
| 68 | #66 not #67                                                                                                                             | 100,083 |     |
| 69 | #63 not #68                                                                                                                             | 1,186   |     |
| 70 | (#69) and (PT=原著論文)                                                                                                                     | 390     | CQ1 |
| 71 | #63 and #68                                                                                                                             | 222     |     |
| 72 | (#71) and (PT=原著論文)                                                                                                                     | 131     | CQ2 |
| 73 | 経済学/ТН                                                                                                                                  | 124,867 |     |
| 74 | コスト/ТА or cost/ТА or 費用/ТА or 支出/ТА or 経済<br>/ТА                                                                                        | 35,727  |     |
| 75 | #73 or #74                                                                                                                              | 145,535 |     |

|    |                     |    |     |
|----|---------------------|----|-----|
| 76 | #69 and #75         | 93 |     |
| 77 | (#76) and (PT=原著論文) | 31 | CQ3 |
| 78 | #71 and #76         | 0  | CQ4 |
